# Supplementary material for: Developing Process for Selecting Research Techniques in Urban Planning and Urban Design with a PRISMA-Compliant Review
Source: MDPI journal article supplement (doi:10.3390/socsci11100471), 2022-10-13
Supplement: s1 [file s1]

## Supplementary A. Coding scheme

Table S1. Coding scheme in 14 books and four book sections between 2005-2021

| Date | Subject area                 | Book title                                                                                                                 | Book section title                                                           | Keywords (KW)                                                         | Publisher                  | GS        | References                                                                           |
|------|------------------------------|----------------------------------------------------------------------------------------------------------------------------|------------------------------------------------------------------------------|-----------------------------------------------------------------------|----------------------------|-----------|--------------------------------------------------------------------------------------|
| 2018 | A) Digital computers         | <i>1. Projection-based clustering through self-organization and swarm intelligence</i>                                     | -----                                                                        | clustering                                                            | Springer                   | 50        | (Thrun, 2018)                                                                        |
| 2009 |                              | -----                                                                                                                      | 1. One-Way ANOVA                                                             | ANOVA                                                                 | Springer                   | 38        | (Heiberger & Neuwirth, 2009)                                                         |
| 2017 | B) Language arts and library | <i>2. An introduction to systematic reviews</i>                                                                            | -----                                                                        | systematic review                                                     | SAGE                       | 1857      | (Gough, Oliver, & Thomas, 2017)                                                      |
|      |                              | <i>3. An introduction to bibliometrics: New development and trends</i>                                                     |                                                                              | bibliometrics                                                         | Chandos Publishing         | 51        | (Ball, 2017)                                                                         |
| 2016 |                              | <i>4. Handbook of bibliometric indicators: Quantitative tools for studying and evaluating research</i>                     | -----                                                                        | bibliometric AND quantitative AND research                            | Wiley-VCH Verlag GmbH & Co | 167       | (Todeschini & Baccini, 2016)                                                         |
|      |                              | <i>5. The content analysis guidebook</i>                                                                                   | -----                                                                        | content analysis                                                      | SAGE                       | 14735     | (Neuendorf, 2016)                                                                    |
| 2020 | C) Public health             | <i>6. How to perform a systematic literature review: A guide for healthcare researchers, practitioners and students</i>    | -----                                                                        | systematic literature review                                          | Springer                   | 14        | (Purssell & McCrae, 2020)                                                            |
| 2019 |                              | <i>7. Cochrane handbook for systematic reviews of interventions</i>                                                        | -----                                                                        | systematic reviews                                                    | Wiley Blackwell            | 43600     | (Higgins, et al., 2019)                                                              |
| 2010 |                              | <i>8. Systematic reviews to support evidence-based medicine</i>                                                            | -----                                                                        | systematic reviews                                                    | CRC Press                  | 800       | (Khan, Kunz, Kleijnen, & Antes, 2011)                                                |
| 2014 |                              | <i>9. Doing a systematic review: a student's guide</i>                                                                     | -----                                                                        | systematic review                                                     | SAGE                       | 555       | (Boland, Cherry, & Dickson, 2014)                                                    |
| 2006 |                              | <i>10. Guidance on the conduct of narrative synthesis in systematic reviews: A Product from the ESRC Methods Programme</i> | -----                                                                        | Methods AND narrative synthesis AND systematic reviews                | Lancaster University       | 2810      | (Popay, et al., 2006)                                                                |
| 2020 |                              | <i>11. Basic quantitative research methods for urban planners</i>                                                          | 2. Ch. 6. Validity and reliability<br>3. Ch. 11 Analysis of variance (ANOVA) | ANOVA AND validity AND reliability AND research methods               | Routledge                  | 4         | (Ewing & Park, 2020)<br>(Duke, Hamidi, & Ewing, 2020)<br>(Stoker, Tian, & Kim, 2020) |
| 2019 |                              | <i>12. Doing research in urban and regional planning: Lessons in practical methods</i>                                     | ----                                                                         | research AND methods OR practical methods urban and regional planning | Routledge                  | 20<br>900 | (MacCallum, Babb, & Curtis, 2019)                                                    |
| 2018 |                              | <i>13. Practical research: Planning and design</i>                                                                         |                                                                              | research Or practical research AND planning AND design                | Pearson Education, Inc.    |           | (Leedy & Ormrod, 2018)                                                               |
| 2014 |                              | <i>14. Smart city: How to create public and economic value with high technology in urban space</i>                         | 4. Smart and digital city: A systematic literature review                    | systematic literature review                                          | Springer                   | 896       | (Cocchia, 2014)                                                                      |

Table S2. Coding scheme in environmental science: medicine, nursing, and library and information sciences in 15 articles in 14 journals selected between 2005-2021

| Subject area and category                                                                                                        | H Index | Journal                                               | Date | Title                                                                                                                            | The aim                                                                                                                                                                           | The question                                                                 | Keywords In title and abstract                                                                                                                                                                                 | Keywords in the text                                                                                                                                                                                                                                               | References                                                      |
|----------------------------------------------------------------------------------------------------------------------------------|---------|-------------------------------------------------------|------|----------------------------------------------------------------------------------------------------------------------------------|-----------------------------------------------------------------------------------------------------------------------------------------------------------------------------------|------------------------------------------------------------------------------|----------------------------------------------------------------------------------------------------------------------------------------------------------------------------------------------------------------|--------------------------------------------------------------------------------------------------------------------------------------------------------------------------------------------------------------------------------------------------------------------|-----------------------------------------------------------------|
| A) Environmental science: (miscellaneous)                                                                                        |         |                                                       |      |                                                                                                                                  |                                                                                                                                                                                   |                                                                              |                                                                                                                                                                                                                |                                                                                                                                                                                                                                                                    |                                                                 |
| Management control and information systems                                                                                       | 55      | 1. <i>Clean Technologies and Environmental Policy</i> | 2019 | 1. Research on green supply chain: a bibliometric analysis                                                                       | To provide a bibliometric overview of green supply chain (GSC).                                                                                                                   | -----                                                                        | bibliometric OR bibliometric data OR bibliometric analysis OR bibliometric indicators OR bibliometric methods OR bibliometric approach OR bibliometric studies AND green supply chains AND literature reviews. | bibliometric (79), bibliometric data (2), bibliometric analysis (33), bibliometric indicators (3), bibliometric methods (2), bibliometric approach (8), bibliometric studies (4), green supply chains (4), keywords (19), literature reviews (1), VOS viewer (10). | (Amirbagheri, Núñez-Carballosa, Guitart-Tarrés, & Merigó, 2019) |
| B) Multidisciplinary: The natural sciences, medical research, engineering, as well as the related social sciences and humanities |         |                                                       |      |                                                                                                                                  |                                                                                                                                                                                   |                                                                              |                                                                                                                                                                                                                |                                                                                                                                                                                                                                                                    |                                                                 |
| Medicine                                                                                                                         | 136     | 2. <i>Environmental Research</i>                      | 2021 | 2. The pathways linking objectively-measured greenspace exposure and mental health: A systematic review of observational studies | To synthesise current evidence on the pathways linking objectively measured green space exposure and mental health.                                                               | -----                                                                        | PRISMA AND systematic review AND synthesise                                                                                                                                                                    | evidence (50), PRISMA (5), systematic review (33), synthesise (8) search terms (2)                                                                                                                                                                                 | (Zhang, Zhang, & Rhodes, 2021)                                  |
|                                                                                                                                  | 332     | 2. <i>PloS ONE</i>                                    | 2014 | 3. Blinded by PRISMA: Are systematic reviewers focusing on PRISMA and ignoring other guidelines?                                 | To assess the frequency of the use of reporting and other guidelines in SRs to assess whether PRISMA is being used inappropriately as a substitute for other relevant guidelines. | Are systematic reviewers focusing on PRISMA and ignoring other guidelines?   | PRISMA AND systematic reviewers                                                                                                                                                                                | meta-analysis (13), PRISMA (61), systematic reviewers (3).                                                                                                                                                                                                         | (Fleming, Koletsi, & Pandis, 2014)                              |
|                                                                                                                                  | 121     | 3. <i>BMC Medical Research Methodology</i>            | 2012 | 5. What is the most appropriate knowledge synthesis method to conduct a review? Protocol for a scoping review                    | To (1) conduct a systematic search of the literature for knowledge synthesis methods across multi-disciplinary fields; 2) compare and contrast the different                      | What is the most appropriate knowledge synthesis method to conduct a review? | knowledge OR knowledge synthesis AND qualitative research AND scoping review AND synthesis OR synthesis                                                                                                        | knowledge (64), knowledge synthesis (44), qualitative research (9), scoping review (13), synthesis methods (36), review (97), and systematic reviews (11)                                                                                                          | (Kastner, et al., 2012)                                         |

| Subject area and category | H Index | Journal                                          | Date | Title                                                                                                                                                      | The aim                                                                                                                                                                       | The question                                                   | Keywords In title and abstract                                                    | Keywords in the text                                                                                                                                                                                                                              | References                                          |
|---------------------------|---------|--------------------------------------------------|------|------------------------------------------------------------------------------------------------------------------------------------------------------------|-------------------------------------------------------------------------------------------------------------------------------------------------------------------------------|----------------------------------------------------------------|-----------------------------------------------------------------------------------|---------------------------------------------------------------------------------------------------------------------------------------------------------------------------------------------------------------------------------------------------|-----------------------------------------------------|
|                           |         |                                                  |      |                                                                                                                                                            | knowledge synthesis methods; and, 3) map out the specific steps to conducting the knowledge syntheses to inform the development of a knowledge synthesis methods manual/tool. |                                                                | methods AND review OR systematic reviews                                          |                                                                                                                                                                                                                                                   |                                                     |
| 429                       | 4.      | BMJ                                              | 2009 | 6. Preferred reporting items for systematic reviews and meta-analyses: the PRISMA statement                                                                | To summarise a revision of the PRISMA.                                                                                                                                        | -----                                                          | meta-analyses AND systematic reviews AND PRISMA Or PRISMA statement AND synthesis | eligibility criteria (20), evidence (76), bias (133), cochrane (74), meta-analyses (16), systematic reviews (39), PRISMA (5), PRISMA statement (12), statistical methods (3), quantitative synthesis (4), synthesis (7), the QUOROM Statement (7) | (Moher, Liberati, Tetzlaff, GAltman, & Group, 2009) |
| 680                       | 5.      | JAM- Journal of the American Medical Association | 2006 | 7. The history and meaning of the journal impact factor                                                                                                    | To review the history and meaning of the journal impact factor                                                                                                                | -----                                                          | impact factor                                                                     | impact factor (28),                                                                                                                                                                                                                               | (Garfield, 2006)                                    |
| 59                        | 6.      | Nephron Clinical Practice                        | 2011 | 8. Adding up the evidence: Systematic reviews and meta-analyses                                                                                            | To explains how systematic reviews and meta-analyses should be performed and how to critically appraise them.                                                                 | -----                                                          | meta-analyses AND systematic reviews                                              | meta-analyses (19), systematic reviews (23).                                                                                                                                                                                                      | (Noordzij, Zoccali, Dekker, & Jager, 2011)          |
| 228                       | 7.      | PLoS Med                                         | 2009 | 9. The PRISMA statement for reporting systematic reviews and meta-analyses of studies that evaluate health care interventions: Explanation and elaboration | To ensure clear presentation of what was planned, done, and found in a systematic review.                                                                                     | -----                                                          | PRISMA OR PRISMA statement AND meta-analyses AND systematic reviews               | PRISMA (78), PRISMA statement (14), meta-analyses (58), systematic reviews (111)                                                                                                                                                                  | (Liberati, et al., 2009)                            |
|                           |         |                                                  | 2007 | 10. Epidemiology and reporting characteristics of systematic reviews                                                                                       | To estimate how a SR was designed and conducted is by examining its report.                                                                                                   | How a SR was designed and conducted is by examining its report | systematic reviews AND meta-analysis                                              | systematic reviews (32), meta-analysis (11).                                                                                                                                                                                                      | (Moher, Tetzlaff, Tricco, Sampson, & Altman, 2007)  |

| Subject area and category                                               | H Index | Journal                                    | Date | Title                                                                                             | The aim                                                                                                                       | The question                                                                                                                                                                                                                                                                                                                                                                                                                                                                                                                                                                                  | Keywords In title and abstract                                                                                                | Keywords in the text                                                                                                                                                                      | References                                                                                                                           |
|-------------------------------------------------------------------------|---------|--------------------------------------------|------|---------------------------------------------------------------------------------------------------|-------------------------------------------------------------------------------------------------------------------------------|-----------------------------------------------------------------------------------------------------------------------------------------------------------------------------------------------------------------------------------------------------------------------------------------------------------------------------------------------------------------------------------------------------------------------------------------------------------------------------------------------------------------------------------------------------------------------------------------------|-------------------------------------------------------------------------------------------------------------------------------|-------------------------------------------------------------------------------------------------------------------------------------------------------------------------------------------|--------------------------------------------------------------------------------------------------------------------------------------|
|                                                                         | 57      | 8. <i>Systematic Reviews</i>               | 2021 | 11. The PRISMA 2020 statement: an updated guideline for reporting systematic reviews              | To update guideline for reporting systematic reviews.                                                                         | -----                                                                                                                                                                                                                                                                                                                                                                                                                                                                                                                                                                                         | knowledge AND evidence AND quantitative AND PRISMA AND meta-analysis AND literature review OR systematic review AND synthesis | knowledge (9), evidence (4), literature review (2), meta-analysis, (15), PRISMA (128), quantitative (4), systematic reviews (97), synthesis (42)                                          | (Page, et al., 2021)                                                                                                                 |
| <i>Nursing</i>                                                          | 85      | 9. <i>Research in Nursing &amp; Health</i> | 2007 | 12. Using qualitative metasummary to synthesize qualitative and quantitative descriptive findings | To develop methods to synthesize qualitative and quantitative research findings in common domains of health-related research. | Which factors favor antiretroviral adherence and which favor non-adherence in HIV-positive women?                                                                                                                                                                                                                                                                                                                                                                                                                                                                                             | knowledge AND qualitative OR quantitative AND synthesize AND systematic reviews                                               | knowledge (4), qualitative (116), qualitative metasummary (24) quantitative (55), synthesize qualitative and quantitative (2), metasummary (35), systematic reviews (7). synthesize (25). | (Sandelowski, Barroso, & Voils, Using qualitative metasummary to synthesize qualitative and quantitative descriptive findings, 2007) |
| C) Social sciences: Miscellaneous, and library and information sciences |         |                                            |      |                                                                                                   |                                                                                                                               |                                                                                                                                                                                                                                                                                                                                                                                                                                                                                                                                                                                               |                                                                                                                               |                                                                                                                                                                                           |                                                                                                                                      |
| Multidisciplinary<br><i>Earth, Atmospheric, and Planetary Sciences</i>  | 213     | 11. <i>Scientific Reports</i>              | 2019 | 4. Meta-analysis of urbanization impact on rainfall modification                                  | To develop a comprehensive understanding of rainfall modification due to urbanization.                                        | 1) Are urban areas modifying rainfall? 2) If yes, by what amount and where is the modification occurring? 3) What is the mechanism or process (aerosols, urban heating, boundary layer dynamics due to surface heat flux gradients) causing urban rainfall change? 4) What is the effect of aerosol types and concentrations? 5) Are there differences between the findings from case studies and climatology-based results? 6) What is the impact of using different models and physics options on the urban rainfall results? 7) What is the effect of terrain on urban rainfall feedbacks? | quantitative AND meta-analysis OR systematic meta-analysis                                                                    | quantitative (15), meta-analysis (49), synthesis (4), systematic review (2),                                                                                                              | (Liu & Niyogi, 2019)                                                                                                                 |

| Subject area and category | H Index | Journal                                                         | Date | Title                                                                                                                           | The aim                                                                                                                                                                          | The question                                                                                                                                                                                                                                                                                                                                                                                                    | Keywords In title and abstract                                                                | Keywords in the text                                                                                                                                                                            | References                  |
|---------------------------|---------|-----------------------------------------------------------------|------|---------------------------------------------------------------------------------------------------------------------------------|----------------------------------------------------------------------------------------------------------------------------------------------------------------------------------|-----------------------------------------------------------------------------------------------------------------------------------------------------------------------------------------------------------------------------------------------------------------------------------------------------------------------------------------------------------------------------------------------------------------|-----------------------------------------------------------------------------------------------|-------------------------------------------------------------------------------------------------------------------------------------------------------------------------------------------------|-----------------------------|
|                           |         |                                                                 |      |                                                                                                                                 |                                                                                                                                                                                  | 8) What is the effect of city size and shape?                                                                                                                                                                                                                                                                                                                                                                   |                                                                                               |                                                                                                                                                                                                 |                             |
| Research methods          | 58      | 12. <i>International Journal of Social Research Methodology</i> | 2005 | 13. Scoping studies: towards a methodological framework                                                                         | To outline a framework for conducting a scoping study based on our recent experiences of reviewing the literature on services for carers for people with mental health problems. | What might we consider to be the main differences between a systematic review and a scoping study?                                                                                                                                                                                                                                                                                                              | literature reviews AND research methods AND scoping OR scoping studies AND systematic reviews | literature reviews (5), research methods (7), scoping (85), scoping studies (14), systematic reviews (13)                                                                                       | (Arksey & O'Malley, 2005)   |
| Research methods          | 74      | 13. <i>Qualitative Research</i>                                 | 2011 | 14. Innovation in qualitative research methods: a narrative review                                                              | To claims for methodological innovation in qualitative research.                                                                                                                 | 1) What claims for innovation in qualitative methods are being made and what is the basis of these claims? 2) In what areas are innovations being claimed? 3) What are researchers' motivations for developing these 'innovations'? 4) To what extent are these 'innovations' taken up by the social science community? 5) What are the implications for qualitative social science of these innovation claims? | Cluster AND qualitative OR methods AND narrative OR narrative methods AND synthesis           | Cluster 2, qualitative (113), qualitative evidence (8), research (53), qualitative (113), qualitative research methods (5), methods (139), narrative (36), narrative methods (6), synthesis (3) | (Wiles, Crow, & Pain, 2011) |
| Physics                   | 116     | 14. <i>Scientometrics</i>                                       | 2010 | 15. An index to quantify an individual's scientific research output that takes into account the effect of multiple coauthorship | To define a new bibliometric indicator.                                                                                                                                          | 1) What is the relative size of h contributing $\delta h$ -core) versus h-non-contributing papers in a scientific field or subfield over a given time period.<br>2) Are they similar or very different between fields where the citation rate may vary greatly?                                                                                                                                                 | AND The index $h$                                                                             | bibliometric (15), evidence (1), quantitative (1), The h-index (46),                                                                                                                            | (Hirsch, 2010)              |

Table S3. Coding scheme in urban planning and urban design in 18 articles in 9 journals selected between 2017-2021

| Subject area and category                                                           | H Index | Journal                                | Date | Title                                                                                                | The aim                                                                                                                                                                                                                       | The research goal or objective                                                                                                                                                                                                                                  | The question                                                                                                | Keywords in title and abstract                                                                                                   | Keywords in the text (numberes)                                                                                                                                | References                                              |
|-------------------------------------------------------------------------------------|---------|----------------------------------------|------|------------------------------------------------------------------------------------------------------|-------------------------------------------------------------------------------------------------------------------------------------------------------------------------------------------------------------------------------|-----------------------------------------------------------------------------------------------------------------------------------------------------------------------------------------------------------------------------------------------------------------|-------------------------------------------------------------------------------------------------------------|----------------------------------------------------------------------------------------------------------------------------------|----------------------------------------------------------------------------------------------------------------------------------------------------------------|---------------------------------------------------------|
| A) Social sciences: Development, sociology and political science, and urban studies | 90      | 1. <i>Cities</i>                       | 2021 | 1. Urban blue spaces and human health: A systematic review and meta-analysis of quantitative studies | To systematically review the evidence for the relationship between blue space and health and quantify this relationship specifically in urban environments.                                                                   | To examine and begin to quantify evidence of the potential salutogenic health impacts of blue spaces in an urban context.                                                                                                                                       | -----                                                                                                       | evidence AND quantitative studies AND quantitative synthesis OR the synthesis AND PRISMA AND systematic review AND meta-analysis | evidence (39), quantitative (6), planning (14), systematic review (22), meta-analysis (22), PRISMA (3), synthesis (10)                                         | (Smith, et al., 2021)                                   |
|                                                                                     |         |                                        | 2021 | 2. Mapping hybrid cities through location-based technologies: A systematic review of the literature  | To investigate the emerging location-based and mapping technologies to develop a clearer understanding on their applicability in the urban context by identifying and categorizing the key drivers based on desired outcomes. | To focus on integrating results, finding gaps in knowledge and explaining arguments, and identifying key issues.<br>To clarify an aspects related to the deliberate use of location-based technologies for mapping various dimensions of the urban environment. | -----                                                                                                       | evidence AND systematic review AND synthesis                                                                                     | evidence (2), knowledge (15), literature review (9), narratives (11), planning (11), systematic review (9), Storytelling (6), synthesis (3), search string (3) | (Tarachucky, et al., 2021)                              |
|                                                                                     |         |                                        | 2019 | 3. Identifying the results of smart city development: Findings from systematic literature review     | To provide insights into the results of smart city development, either positive or negative and hypothetical or observed.                                                                                                     | To identify the results of smart city development.                                                                                                                                                                                                              | What kinds of results are expected and realized from implementing a smart city?                             | PRISMA AND systematic literature review OR systematic reviews                                                                    | evidence (20), knowledge (34), PRISMA (3), systematic literature review (16), planning (16), systematic review (4), storytelling (2), urban planning (5).      | (Lim, Edelenbos, & Gianoli, 2019)                       |
| B) Social sciences: Geography, planning and development                             | 44      | 2. <i>Planning Theory and Practice</i> | 2019 | 4. A heuristic approach for exploring uncertainties in transport planning research                   | To identify situations of uncertainty from differing perspectives of transport planning research.                                                                                                                             | To provide a useful tool for theoretical and empirical research in transport planning.                                                                                                                                                                          | Where are uncertainties identified?; How are uncertainties interpreted?; and how are uncertainties managed? | Knowledge AND literature review AND planning AND planning literature AND heuristic approach                                      | Knowledge (17), literature review (4) planning (208), planning literature (9), heuristic approach (9), systematic exploratory search (1),                      | (Navarro-Ligero, Soria-Lara, & Valenzuela-Montes, 2019) |

| Subject area and category | H Index | Journal                                  | Date | Title                                                                                                                                          | The aim                                                                                                                                                                              | The research goal or objective                                                                                                              | The question                                                                                                                                        | Keywords in title and abstract                                                                                                                                                | Keywords in the text (numbers)                                                                                                                                                          | References                                        |
|---------------------------|---------|------------------------------------------|------|------------------------------------------------------------------------------------------------------------------------------------------------|--------------------------------------------------------------------------------------------------------------------------------------------------------------------------------------|---------------------------------------------------------------------------------------------------------------------------------------------|-----------------------------------------------------------------------------------------------------------------------------------------------------|-------------------------------------------------------------------------------------------------------------------------------------------------------------------------------|-----------------------------------------------------------------------------------------------------------------------------------------------------------------------------------------|---------------------------------------------------|
|                           |         |                                          | 2017 | 5. Planning as persuaded storytelling: The role of genre in planners' narratives                                                               | It suggests ways to push back against the limits of genre, to produce texts more responsive to a project of mutual learning between authors and readers.                             | To interrogate the way genre shapes planning narratives, and the subsequent effects on authorship.                                          | The final product is "A Capabilities Approach To Arts And Culture?"                                                                                 | evidence AND planning AND storytelling AND narratives OR planners' narratives                                                                                                 | evidence (3), planning (125), storytelling (30), narratives (13), planners' narratives (4),                                                                                             | (Zitcer, 2017)                                    |
|                           | 57      | 3. <i>Journal of Planning Literature</i> | 2021 | 6. Systematic literature review on smart mobility: A framework for future "quantitative" developments                                          | To reorganize theoretical and empirical research on smart mobility through the systematic literature review approach.                                                                | To reach an extended and shared definition of smart mobility using the cluster analysis.<br>To propose a new definition of smart mobility.  | 1) Which are the main lines of research on smart mobility?<br>2) Is it possible to give a definition of smart mobility that includes these aspects? | quantitative OR systematic literature review AND cluster analysis                                                                                                             | cluster analysis (4), quantitative (6), systematic literature review (9), planning (49)                                                                                                 | (Francini, Chieffallo, Palermo, & Viapiana, 2021) |
|                           |         |                                          | 2020 | 7. One and the same? A systematic literature review of residential property investor types                                                     | To evaluates the status quo of academic engagement.                                                                                                                                  | To gain a comprehensive view of the literature addressing investors and investments into the residential urban built environment.           | To identify the evidence, identify gaps, and provide a framework for positioning research endeavours.                                               | evidence AND systematic literature review AND meta-categorization AND planning AND synthesis                                                                                  | evidence (11), systematic literature review (11), meta-categorization (17), planning (73), synthesis (2)                                                                                | (Özogul & Tasan-Kok, 2020)                        |
|                           |         |                                          | 2020 | 8. Mapping the landscape of behavioral theories: Systematic literature review                                                                  | It is important for planners to broaden their horizon and be aware of the full list of behavioral theories available across disciplines.                                             | To identify theories of general human behavior that can be applied to all disciplines but especially to social sciences including planning. | -----                                                                                                                                               | literature review OR systematic literature review AND planning                                                                                                                | evidence (3), literature review (18), systematic literature review (5), planning (41)                                                                                                   | (Kwon & Silva, 2020)                              |
|                           |         |                                          | 2019 | 9. Qualitative comparative analysis (QCA) in spatial planning research and related disciplines: A systematic literature review of applications | This article focuses on the main properties of the method , highlights the ways it can be used, and examines the main reasonswhy it is interesting for spatial planning researchers. | It introduces and discuss the various methods in spatial planning research                                                                  | When, where, and how is QCA used in SPARD and what are the main advantages of QCA for spatial planning research?                                    | evidence AND comparative analysis AND qualitative comparative analysis (QCA) AND planning OR spatial planning (OR spatial planning research, AND systematic literature review | evidence (4), comparative analysis (57), qualitative comparative analysis (56), planning (97), spatial planning (54), spatial planning research (30), systematic literature review (8). | (Verweij & Trell, 2019)                           |

| Subject area and category                                                               | H Index | Journal                                              | Date | Title | The aim                                                                                 | The research goal or objective                                                                                                                                                                                                                                                  | The question                                                                                                                                                          | Keywords in title and abstract                                                                                                                         | Keywords in the text (numberes)                                                                                                                 | References                                                                                                              |                                             |
|-----------------------------------------------------------------------------------------|---------|------------------------------------------------------|------|-------|-----------------------------------------------------------------------------------------|---------------------------------------------------------------------------------------------------------------------------------------------------------------------------------------------------------------------------------------------------------------------------------|-----------------------------------------------------------------------------------------------------------------------------------------------------------------------|--------------------------------------------------------------------------------------------------------------------------------------------------------|-------------------------------------------------------------------------------------------------------------------------------------------------|-------------------------------------------------------------------------------------------------------------------------|---------------------------------------------|
| C) Social sciences: Development, geography, planning and development, and urban Studies | 72      | 4. <i>Journal of Planning Education and Research</i> | 2020 | 10.   | Understanding quality in planning consultancy: A review and synthesis of the literature | To collate definitions of quality, highlight core concepts of competent practice, and synthesize their application to any planning process or organization.<br>To reflect upon the delivery of quality in consultancy work, including that commissioned by government agencies. | For achieving many forms of quality through meeting diverse publics' interests, and through the continual improvement of the standards and standing of our profession | -----                                                                                                                                                  | planning AND planning literature AND synthesis AND urban planning AND review AND synthesis                                                      | snowballed planning (204), planning literature (5), synthesis (5), urban planning (4), review (27)                      | (McLeod & Schapper, 2020)                   |
|                                                                                         |         |                                                      | 2019 | 11.   | Guidance on conducting a systematic literature review                                   | To establish the foundation of academic inquiries.                                                                                                                                                                                                                              | To provide guidance on how to conduct systematic literature review.                                                                                                   | How to enhance rigor in literature reviews in planning education and research?                                                                         | knowledge AND literature reviews OR systematic reviews OR systematic search OR systematic literature review AND synthesis OR research synthesis | knowledge (11), literature reviews (35), systematic reviews (18), review (10), synthesis (106), research synthesis (10) | (Xiao & Watson, 2019)                       |
| D) Social sciences: Geography, planning and development, and transportation             | 61      | 5. <i>Sustainable Cities and Society</i>             | 2021 | 12.   | The author                                                                              |                                                                                                                                                                                                                                                                                 |                                                                                                                                                                       |                                                                                                                                                        |                                                                                                                                                 |                                                                                                                         |                                             |
|                                                                                         |         |                                                      | 2020 | 13.   | Modelling and urban planning: A systematic review of performance-based approaches       | To explore how much modeling tools are contributing to the renovation of the urban planning practice based on(even if not explicitly declared) flexible and performance based approaches.                                                                                       | To create a comprehensive evidence synthesis that captures relevant articles on the PBP and modeling in literature.                                                   | 1) Which is the contribution of modeling within PBP approaches moving cities toward ssustainability? 2) Which applicability for modelingin PBP exists? | evidence AND synthesis AND evidence synthesis AND planning OR urban planning AND systematic review                                              | evidence (2), synthesis (2), (1), planning (227), urban planning (76), systematic review (7)                            | (Pelorosso, 2020)                           |
| E) Social sciences: Geography, planning and development, and urban Studies              | 45      | 6. <i>Journal of Urban Design</i>                    | 2020 | 14.   | The author                                                                              |                                                                                                                                                                                                                                                                                 |                                                                                                                                                                       |                                                                                                                                                        |                                                                                                                                                 |                                                                                                                         |                                             |
|                                                                                         |         | 7. <i>Urban Climate</i>                              | 2021 | 15.   | A conceptual framework for resilient place assessment based on spatial resilience       | To identify various resilience characteristics and develop a conceptual framework for                                                                                                                                                                                           | To determine the frequency and meaning of URAs so thatthey can be used in the assessment framework.                                                                   | ----                                                                                                                                                   | content analysis AND qualitative OR qualitative methods OR qualitative review OR review AND                                                     | content analysis (6), PRISMA (4), review (21), qualitative (2), systematic review (2), planning (40),                   | (Dastjerdi, Lak, Ghaffari, & Sharifi, 2021) |



| Subject area and category | H Index | Journal | Date | Title                                                                                                                      | The aim                                                                                                                                                              | The research goal or objective                                                                                                                                                                                                         | The question                                                                                                                                                                                                                                                                                                                                                                                                                                                                                                                                                                                                                 | Keywords in title and abstract                                                | Keywords in the text (numberes)                                                                                                                                                                                           | References                                           |
|---------------------------|---------|---------|------|----------------------------------------------------------------------------------------------------------------------------|----------------------------------------------------------------------------------------------------------------------------------------------------------------------|----------------------------------------------------------------------------------------------------------------------------------------------------------------------------------------------------------------------------------------|------------------------------------------------------------------------------------------------------------------------------------------------------------------------------------------------------------------------------------------------------------------------------------------------------------------------------------------------------------------------------------------------------------------------------------------------------------------------------------------------------------------------------------------------------------------------------------------------------------------------------|-------------------------------------------------------------------------------|---------------------------------------------------------------------------------------------------------------------------------------------------------------------------------------------------------------------------|------------------------------------------------------|
|                           |         |         |      | approach: An integrative review                                                                                            | assessing place resilience.                                                                                                                                          |                                                                                                                                                                                                                                        |                                                                                                                                                                                                                                                                                                                                                                                                                                                                                                                                                                                                                              | PRISMA AND snowball AND planning AND urban design                             | urban design (29), snowball (2)                                                                                                                                                                                           |                                                      |
|                           | 43      |         | 2020 | 16. Between aspiration and actuality: A systematic review of morphological heat mitigation strategies in hot urban deserts | To review the measured biophysical effects of heat mitigative interventions (morphology, materials, and landscaping) that have been studied in hot desert localities | This review integrates a mixed methodological approach with literature review protocols to review and synthesize the empirical evidence of different methodological strands; quantitative, qualitative or mixed primary-level studies. | 1) what is the state of knowledge in urban heat mitigative interventions within hot urban desert environments with an emphasis on morphological strategies?;<br>2) What are the different mitigative strategies employed and how can they be categorized based on the mitigation objectives with regards to time, scale and mitigated medium (e.g. surface, air, or thermal comfort)?;<br>3) In the implementation of morphological mitigation strategies, what explains the success of their varied thermal performance?;<br>And 4) what are the challenges and uncertainties that determine the actualities of success and | knowledge AND systematic review OR systematic literature review AND synthesis | knowledge (9), review (59). systematic review (6), systematic literature review (1), synthesis (14), research synthesis (5), mixed method research (2), quantitative (5), qualitative (6), methods (10), search terms (1) | (AlKhaled, PaulCoseo, Brazel, Cheng, & Sailor, 2020) |

| Subject area and category | H Index | Journal                                   | Date | Title                                                                                             | The aim                                                                                                                                            | The research goal or objective                                                                        | The question                                                                                                                                                                                                                                                                                                                                                                                                                                                                                                                 | Keywords in title and abstract                                                                                              | Keywords in the text (numberes)                                                                                                                                | References                        |
|---------------------------|---------|-------------------------------------------|------|---------------------------------------------------------------------------------------------------|----------------------------------------------------------------------------------------------------------------------------------------------------|-------------------------------------------------------------------------------------------------------|------------------------------------------------------------------------------------------------------------------------------------------------------------------------------------------------------------------------------------------------------------------------------------------------------------------------------------------------------------------------------------------------------------------------------------------------------------------------------------------------------------------------------|-----------------------------------------------------------------------------------------------------------------------------|----------------------------------------------------------------------------------------------------------------------------------------------------------------|-----------------------------------|
|                           |         |                                           |      |                                                                                                   |                                                                                                                                                    |                                                                                                       | ultimately inform the scholarship and practice?                                                                                                                                                                                                                                                                                                                                                                                                                                                                              |                                                                                                                             |                                                                                                                                                                |                                   |
|                           | 18      | 8. <i>Urban Design and Planning (ICE)</i> | 2020 | 17. The authors                                                                                   |                                                                                                                                                    |                                                                                                       |                                                                                                                                                                                                                                                                                                                                                                                                                                                                                                                              |                                                                                                                             |                                                                                                                                                                |                                   |
|                           | 24      | 9. <i>Urban Research &amp; Practice</i>   | 2020 | 18. Cultural and creative clusters – a systematic literature review and a renewed research agenda | To fill a gap of the evolution of the terminology and research associated with what can be called today 'cultural and/or creative clusters' (CCC). | To discuss some aspects of the issues of interdisciplinarity researches in Social and Human Sciences. | 1) What are cultural/creative district, cluster and quarter?<br>2) When did these concepts appear?<br>3) Are these concepts overlapping?<br>4) Who has been writing about these?<br>5) In which disciplines and in which countries?<br>6) What has been the evolution in terms of conceptual understanding?<br>7) What are the themes and dimensions associated with these concepts?<br>8) How have they been studied and researched (methodologies)?<br>9) What issues and research gap are present within this literature? | bibliometric AND cluster AND meta-analysis AND planning AND systematic literature review AND urban design OR urban planning | bibliometric (1), cluster (176) meta-analysis (5) systematic literature review (7), planning (38), systematic review (3), urban design (6), urban planning (9) | (Chapain & Sagot-Duvauroux, 2020) |
