# Supplementary material for: Developing Process for Selecting Research Techniques in Urban Planning and Urban Design with a PRISMA-Compliant Review
Source: MDPI journal article supplement (doi:10.3390/socsci11100471), 2022-10-13
Supplement: s1 [file s1]

Archive with 4 entries (4 files):
- Supplementary A.pdf
- Supplementary B.pdf
- Supplementary C.pdf
- Supplementary D.pdf
