# Supplementary material for: Developing Process for Selecting Research Techniques in Urban Planning and Urban Design with a PRISMA-Compliant Review
Source: MDPI journal article supplement (doi:10.3390/socsci11100471), 2022-10-13
Supplement: s1 [file s1 › Supplementary B.pdf]

## Supplementary B. Keywords in environmental sciences

Table S4. Keywords in medicine, interdisciplinarians, nursing, and library and information sciences in 15 articles in 14 journals between 2017-2021

| Journal                                                    | Title                                                                                                                                                      | Bibliometric | Cochrane | Cluster | Content analysis | Evidence | Knowledge | Quantitative | Literature review | Meta-analysis | Search terms | Narratives | Green supply chains | VOS viewer | PRISMA | Scoping | Synthesis | Systematic review | Systematic literature review | Graphical analysis | References                                                      |
|------------------------------------------------------------|------------------------------------------------------------------------------------------------------------------------------------------------------------|--------------|----------|---------|------------------|----------|-----------|--------------|-------------------|---------------|--------------|------------|---------------------|------------|--------|---------|-----------|-------------------|------------------------------|--------------------|-----------------------------------------------------------------|
| 1. <i>Clean Technologies and Environmental Policy</i>      | 1. Research on green supply chain: a bibliometric analysis                                                                                                 | 79           | 0        | 4       | 0                | 0        | 6         | 3            | 15                | 0             | 0            | 0          | 4                   | 10         | 0      | 0       | 0         | 2                 | 4                            | 5                  | (Amirbagheri, Núñez-Carballosa, Guitart-Tarrés, & Merigó, 2019) |
| 2. <i>Environmental Research</i>                           | 2. The pathways linking objectively-measured greenspace exposure and mental health: A systematic review of observational studies                           | 0            | 0        | 0       | 0                | 50       | 0         | 0            | 0                 | 10            | 2            | 0          | 0                   | 0          | 5      | 2       | 3         | 33                | 0                            | 0                  | (Zhang, Zhang, & Rhodes, 2021)                                  |
| 3. <i>PloS ONE</i>                                         | 3. Blinded by PRISMA: Are systematic reviewers focusing on PRISMA and ignoring other guidelines?                                                           | 0            | 0        | 0       | 0                | 6        | 5         | 0            | 0                 | 13            | 0            | 0          | 0                   | 0          | 61     | 0       | 0         | 3                 | 0                            | 0                  | (Fleming, Koletsi, & Pandis, 2014)                              |
| 4. <i>Scientific Reports</i>                               | 4. Meta-analysis of urbanization impact on rainfall modification                                                                                           | 0            | 0        | 7       | 0                | 4        | 8         | 15           | 2                 | 49            | 0            | 0          | 0                   | 0          | 0      | 0       | 4         | 0                 | 0                            | 0                  | (Liu & Niyogi, 2019)                                            |
| 5. <i>BMC Medical Research Methodology</i>                 | 5. What is the most appropriate knowledge synthesis method to conduct a review? Protocol for a scoping review                                              | 0            | 16       | 0       | 2                | 44       | 89        | 30           | 2                 | 8             | 0            | 2          | 0                   | 0          | 0      | 24      | 157       | 23                | 0                            | 0                  | (Kastner, et al., 2012)                                         |
| 6. <i>BMJ</i>                                              | 6. Preferred reporting items for systematic reviews and meta-analyses: the PRISMA statement                                                                | 0            | 7        | 0       | 0                | 20       | 2         | 1            | 0                 | 13            | 0            | 0          | 0                   | 0          | 53     | 0       | 7         | 73                | 0                            | 0                  | (Moher, Liberati, Tetzlaff, GAltman, & Group, 2009)             |
| 7. <i>JAM- Journal of the American Medical Association</i> | 7. The history and meaning of the journal impact factor                                                                                                    | 1            | 0        | 0       | 0                | 0        | 0         | 0            | 0                 | 0             | 0            | 0          | 0                   | 0          | 0      | 0       | 0         | 0                 | 0                            | 0                  | (Garfield, 2006)                                                |
| 8. <i>Nephron Clinical Practice</i>                        | 8. Adding up the evidence: Systematic reviews and meta-analyses                                                                                            | 0            | 6        | 0       | 0                | 5        | 2         | 3            | 0                 | 29            | 0            | 0          | 0                   | 0          | 2      | 0       | 1         | 54                | 0                            | 0                  | (Noordzij, Zoccali, Dekker, & Jager, 2011)                      |
| 9. <i>PLoS Med</i>                                         | 9. The PRISMA statement for reporting systematic reviews and meta-analyses of studies that evaluate health care interventions: Explanation and elaboration | 0            | 74       | 0       | 0                | 76       | 10        | 10           | 0                 | 103           | 2            | 0          | 0                   | 0          | 78     | 0       | 23        | 111               | 0                            | 0                  | (Liberati, et al., 2009)                                        |
|                                                            | 10. Epidemiology and reporting characteristics of systematic reviews                                                                                       | 0            | 82       | 0       | 0                | 13       | 0         | 4            | 2                 | 11            | 2            | 0          | 0                   | 0          | 0      | 0       | 6         | 46                | 0                            | 0                  | (Moher, Tetzlaff, Tricco, Sampson, & Altman, 2007)              |
