# Supplementary material for: Developing Process for Selecting Research Techniques in Urban Planning and Urban Design with a PRISMA-Compliant Review
Source: MDPI journal article supplement (doi:10.3390/socsci11100471), 2022-10-13
Supplement: s1 [file s1 › Supplementary C.pdf]

## Supplementary C. Keywords in Social Sciences

Table S5. Keywords in development, geography, planning and development, and urban Studies in 18 articles in 9 journals between 2017–2021

| Journal                                              | Title                                                                                                                                           | Bibliometric | Clusters | Content analysis | Evidence | Knowledge | Quantitative | Literature review | Meta-analysis | Meta-categorization | Narratives | Planning | Planning literature | PRISMA | Scoping review | Storytelling | Snowballing | Snowballed planning | Synthesis | Systematic review | Systematic literature review | Urban design | Urban Planning | References                          |
|------------------------------------------------------|-------------------------------------------------------------------------------------------------------------------------------------------------|--------------|----------|------------------|----------|-----------|--------------|-------------------|---------------|---------------------|------------|----------|---------------------|--------|----------------|--------------|-------------|---------------------|-----------|-------------------|------------------------------|--------------|----------------|-------------------------------------|
| 1. <i>Cities</i>                                     | 1. Urban blue spaces and human health: A systematic review and meta-analysis of quantitative studies                                            | 0            | 0        | 0                | 39       | 0         | 6            | 1                 | 22            | 0                   | 0          | 14       | 0                   | 3      | 2              | 0            | 0           | 0                   | 10        | 22                | 0                            | 0            | 9              | (Smith, et al., 2021)               |
|                                                      | 2. Mapping hybrid cities through location-based technologies: A systematic review of the literature                                             | 0            | 0        | 0                | 2        | 15        | 0            | 9                 | 0             | 0                   | 11         | 11       | 0                   | 0      | 0              | 6            | 0           | 0                   | 3         | 9                 | 3                            | 1            | 4              | (Tarachucky, et al., 2021)          |
|                                                      | 3. Identifying the results of smart city development: Findings from systematic literature review                                                | 0            | 0        | 0                | 20       | 34        | 3            | 16                | 0             | 0                   | 0          | 16       | 0                   | 3      | 0              | 2            | 0           | 0                   | 0         | 4                 | 15                           | 0            | 5              | (Lim, Edelenbos, and Gianoli, 2019) |
| 2. <i>Planning Theory and Practice</i>               | 4. A heuristic approach for exploring uncertainties in transport planning research                                                              | 0            | 0        | 0                | 4        | 17        | 4            | 4                 | 0             | 4                   | 0          | 208      | 9                   | 0      | 0              | 0            | 0           | 0                   | 0         | 0                 | 0                            | 0            | 2              | (Navarro et al., 2019)              |
|                                                      | 5. Planning as persuaded storytelling: The role of genre in planners' narratives                                                                | 0            | 0        | 0                | 4        | 7         | 2            | 1                 | 0             | 0                   | 24         | 125      | 1                   | 0      | 0              | 30           | 0           | 0                   | 0         | 0                 | 0                            | 0            | 0              | (Zitcer, 2017)                      |
| 3. <i>Journal of Planning Education and Research</i> | 6. Understanding quality in planning consultancy: A review and synthesis of the literature                                                      | 0            | 0        | 0                | 0        | 18        | 0            | 0                 | 0             | 0                   | 0          | 204      | 5                   | 0      | 0              | 5            | 0           | 204                 | 2         | 0                 | 0                            | 0            | 4              | (McLeod and Schapper, 2020)         |
|                                                      | 7. Guidance on conducting a systematic literature review                                                                                        | 0            | 0        | 3                | 27       | 11        | 27           | 35                | 23            | 0                   | 32         | 51       | 3                   | 0      | 13             | 0            | 0           | 0                   | 106       | 18                | 10                           | 0            | 6              | (Xiao and Watson, 2019)             |
| 4. <i>Journal of Planning Literature</i>             | 8. Systematic literature review on smart mobility: A framework for future “quantitative” developments                                           | 0            | 3        | 0                | 0        | 3         | 4            | 13                | 0             | 0                   | 0          | 49       | 0                   | 0      | 0              | 0            | 0           | 0                   | 2         | 0                 | 10                           | 0            | 49             | (Francini et al., 2021)             |
|                                                      | 9. One and the same? A systematic literature review of residential property investor types                                                      | 0            | 0        | 0                | 11       | 9         | 5            | 19                | 0             | 17                  | 2          | 73       | 0                   | 0      | 0              | 0            | 0           | 0                   | 2         | 4                 | 11                           | 0            | 73             | (Özogul and Tasan-Kok, 2020)        |
|                                                      | 10. Mapping the landscape of behavioural theories: Systematic literature review                                                                 | 0            | 0        | 0                | 3        | 0         | 4            | 18                | 0             | 0                   | 0          | 38       | 0                   | 0      | 0              | 0            | 0           | 0                   | 0         | 0                 | 6                            | 0            | 0              | (Kwon and Silva, 2020)              |
|                                                      | 11. Qualitative comparative analysis (QCA) in spatial planning research and related disciplines: A systematic literature review of applications | 0            | 0        | 0                | 4        | 1         | 16           | 0                 | 0             | 0                   | 0          | 97       | 0                   | 0      | 0              | 0            | 0           | 0                   | 0         | 0                 | 8                            | 0            | 97             | (Verweij and Trell, 2019)           |

| Journal                                  | Title                                                                                                                      | Bibliometric | Clusters | Content analysis | Evidence | Knowledge | Quantitative | Literature review | Meta-analysis | Meta-categorization | Narratives | Planning | Planning literature | PRISMA | Scoping review | Storytelling | Snowballing | Snowballed planning | Synthesis | Systematic review | Systematic literature review | Urban design | Urban Planning | References                          |
|------------------------------------------|----------------------------------------------------------------------------------------------------------------------------|--------------|----------|------------------|----------|-----------|--------------|-------------------|---------------|---------------------|------------|----------|---------------------|--------|----------------|--------------|-------------|---------------------|-----------|-------------------|------------------------------|--------------|----------------|-------------------------------------|
| 7. <i>Sustainable Cities and Society</i> | 13. Modelling and urban planning: A systematic review of performance-based approaches                                      | 0            | 0        | 0                | 2        | 0         | 2            | 0                 | 0             | 0                   | 0          | 227      | 0                   | 0      | 0              | 0            | 0           | 0                   | 2         | 7                 | 0                            | 2            | 76             | (Pelorosso, 2020)                   |
| 8. <i>Urban Climate</i>                  | 15. A conceptual framework for resilient place assessment based on spatial resilience approach: An integrative review      | 0            | 0        | 6                | 0        | 5         | 2            | 5                 | 0             | 0                   | 1          | 40       | 0                   | 4      | 0              | 0            | 0           | 2                   | 0         | 2                 | 0                            | 29           | 76             | (Dastjerdi, et al., 2021)           |
|                                          | 16. Between aspiration and actuality: A systematic review of morphological heat mitigation strategies in hot urban deserts | 0            | 2        | 0                | 5        | 9         | 5            | 1                 | 0             | 0                   | 0          | 4        | 0                   | 1      | 0              | 0            | 0           | 0                   | 11        | 6                 | 1                            | 0            | 0              | (AlKhaled, et al., 2020)            |
| 10. <i>Urban Research &amp; Practice</i> | 18. Cultural and creative clusters – a systematic literature review and a renewed research agenda                          | 0            | 176      | 0                | 3        | 13        | 9            | 7                 | 0             | 5                   | 0          | 38       | 1                   | 0      | 0              | 0            | 0           | 3                   | 0         | 3                 | 7                            | 6            | 10             | (Chapain and Sagot-Duvauroux, 2020) |
