# Supplementary material for: Developing Process for Selecting Research Techniques in Urban Planning and Urban Design with a PRISMA-Compliant Review
Source: MDPI journal article supplement (doi:10.3390/socsci11100471), 2022-10-13
Supplement: s1 [file s1 › Supplementary D.pdf]

## Supplementary D. Keywords used to identify the relevant journals

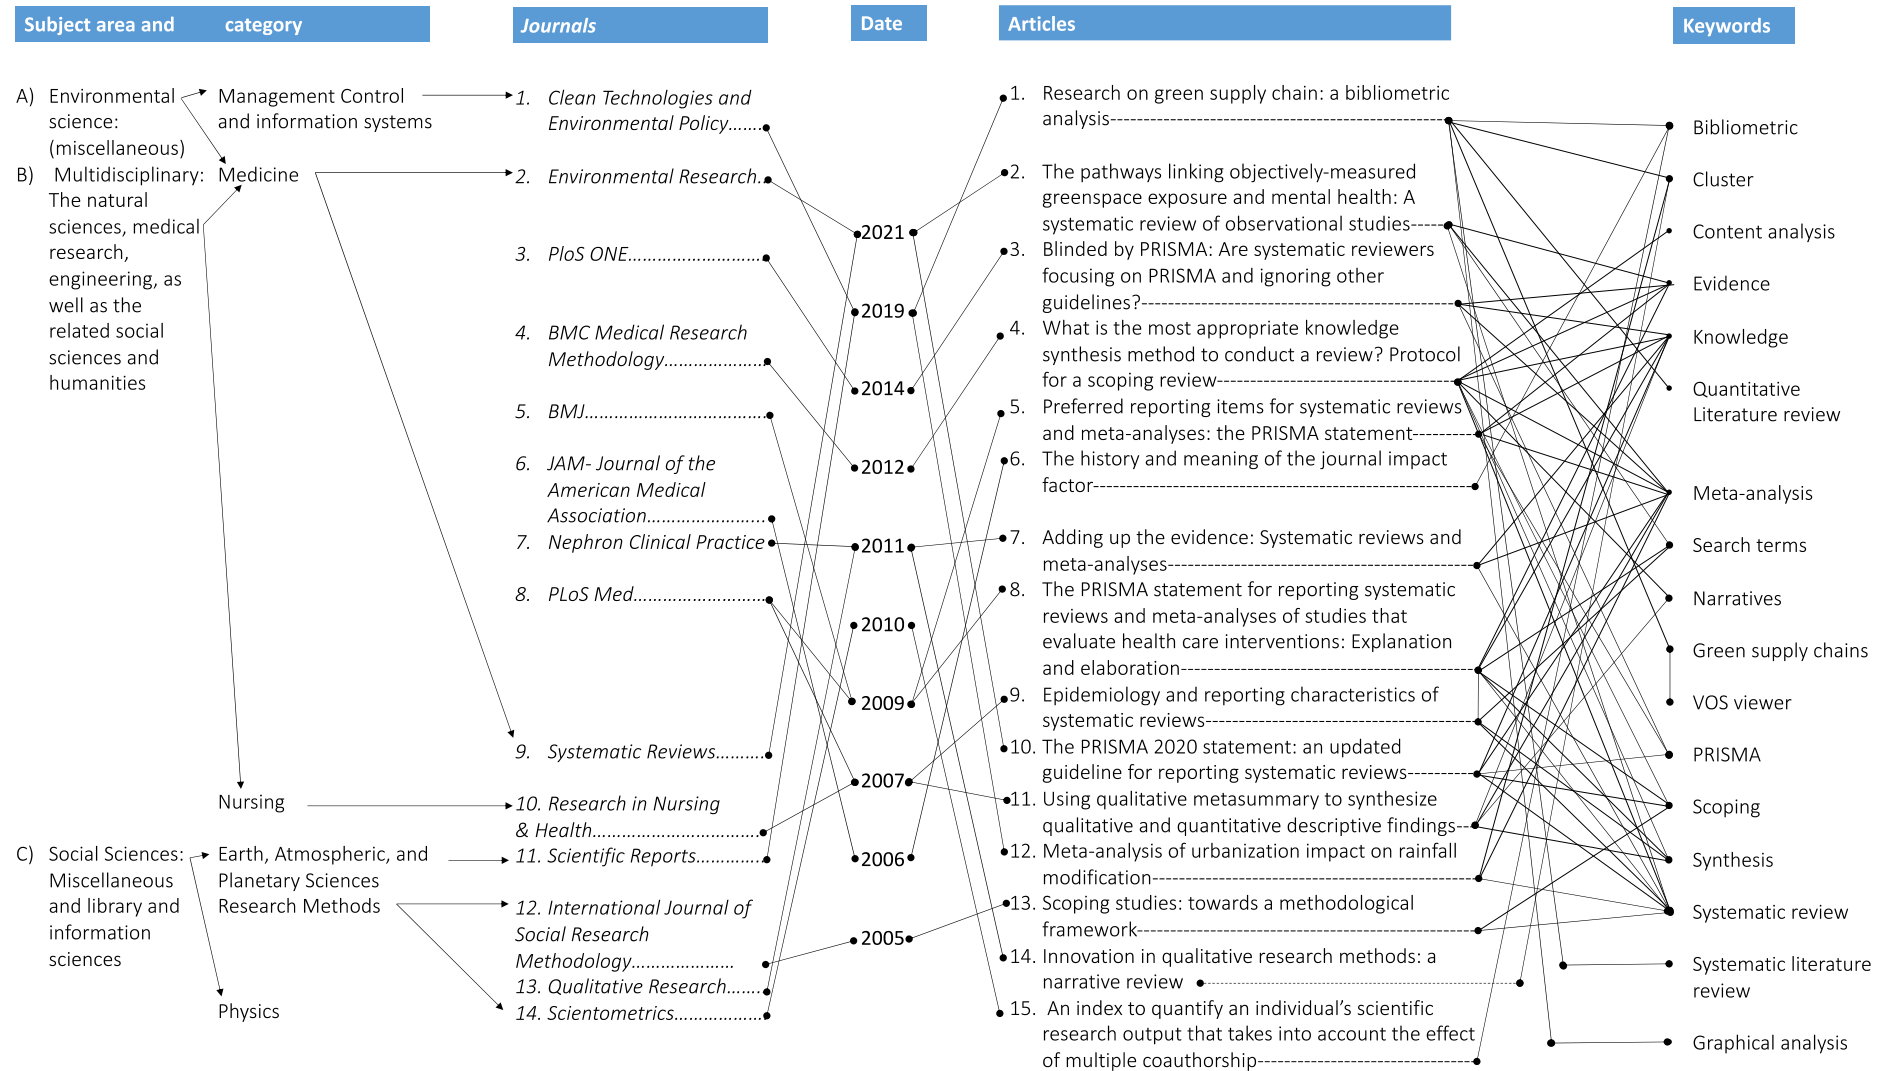

**Figure S1.** Keywords used to identify multidisciplinary, miscellaneous, and environmental science journals.

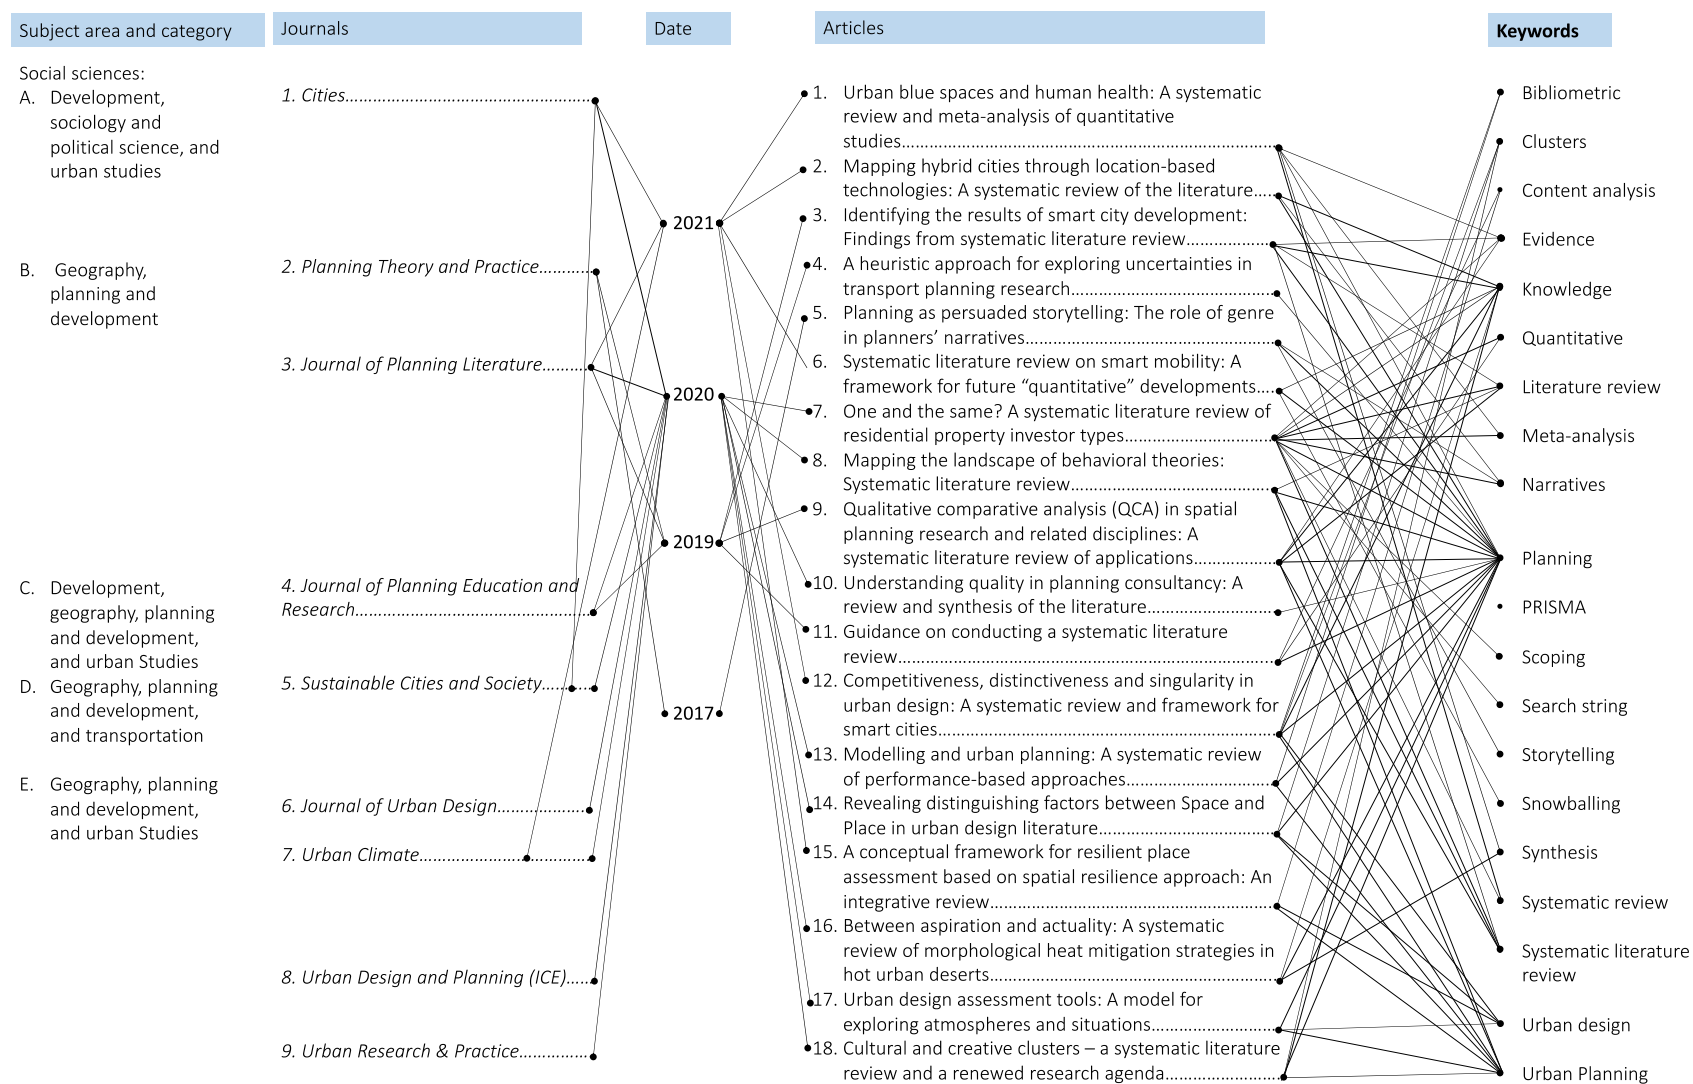

**Figure S2.** Keywords used to identify social science journals.
